# Supplementary material for: Evidence for instructions-based updating of task-set representations: the informed fadeout effect
Source: Springer Nature journal article supplement (doi:10.1007/s00426-017-0842-1), 2017-02-15
Supplement: MOESM1 [file 12070750]

Evidence for Instructions-Based Updating of Task-Set Representations: The Informed Fadeout Effect

Maayan Pereg and Nachshon Meiran

**Supplementary Materials**

Two preliminary experiments are reported. Both of the experiments showed the informed fadeout effect: improved RT from the second trial of the informed condition, relative to the uninformed condition. Experiment S1 tested whether the (predictable) length of the informed fadeout sequence would influence participants’ willingness to comply with the fadeout instruction. The results showed that fadeout length did not matter, and the informed fadeout effect emerged in very short sequences as well. This is why a constant (though relatively long) fadeout phase was employed in Experiments 1-3. Experiment S2 tested whether the position of the informed fadeout sequence in the block influences performance. The results showed that larger informed fadeout effect was found at the end of trial-blocks, and thus this design was chosen for Experiments 1-3.

**Supplementary Material S1 - Experiment S1**

In this experiment, the location of the fadeout phases within the block was randomly determined, with every block containing both informed and uninformed fadeout phases. The main research question was whether the length of the informed fadeout phase would influence performance, in an attempt to find the ideal fadeout length for future experiments. We predicted that response times (RT) should be quicker and percentage of errors (PE) should be lower relative to the uninformed fadeout; but more so when the informed fadeout is expected to be longer, presumably more worthwhile to commit to the task cancelation.

**Method**

**Participants.** Twenty-four Ben-Gurion University of the Negev students participated in the experiment in return for course credit (21 females, mean age=23.04, SD=0.98). All of the participants reported having normal or corrected-to-normal vision including intact color vision and not having diagnosed attention deficits.

**Materials and procedure**. The experiment was run in the same manner as Experiments 1-3. It began with a short 20 trials practice phase followed by an additional practice block of 100 trials.

The experiment proper consisted 24 blocks, 72 trials each (36 repeat trials and 36 switch trial). As opposed to Experiments 1-3, the sequencing of repeat trials was not random. The 36 repeat trials were divided into 18 informed and 18 uninformed trials that appeared in sequences of 4, 6 and 8 trials (one sequence of each length in every condition, on each block). Thus, each block included 3 informed fadeout phases and 3 uninformed fadeout phases, each with a different length (4, 6, and 8 trials), with Length randomly located within the block. The informed fadeout cue included a countdown showing how many trials were left until the fadeout phase would end. This feature was introduced to reduce the chance that participants would re-load the canceled task into WM too early, because of uncertainty regarding when it ends.

**Results and Discussion**

Trial 0 (which serves as baseline) was always a switch trial, meaning that an improvement in performance is expected from Trial 0 to Trial 1. A series of contrasts were performed on marginal means from a factorial design involving the within-subjects independent variables Fadeout-Type (informed-uninformed-single), Fadeout Length (4,6,8), Trial (0-5), and Congruency (congruent-incongruent). The contrasts were set to differentiate between the instruction/experience hypotheses. Thus, we first tested that there were no preliminary differences between the condition, we next test for a step-function following the first fadeout cue (instructions-based), and alternately test for a gradual improvement within the fadeout phase (experience based). Since this was a preliminary experiment, other contrasts were set post-hoc, based on the results. Finally, in order to compare the three Fadeout Length conditions (i.e., 4, 6 and 8 trials), the analysis refers to the first 4 trials in each fadeout length.

**Fadeout Length.** Contrary to our prediction, the results showed no influence for Fadeout-Length (F’s<1, p’s>.40, for all the effects involving this independent variable) and thus the remainder of this section reports analyses pooled across Length.

Figure S1. RT (in ms) and Percentage of Errors (PE) as a function of Trial-Position and Fadeout-Type – Experiment 1. Error bars represent within-subject confidence intervals (Hollands & Jarmasz, 2010; Jarmasz, & Hollands, 2009).

**Difference at Trial 0.** No significant differences were found between the informed and the uninformed conditions at Trial 0 (the uninformed condition was faster by 19 ms, and the informed condition was more accurate by 0.34%) [F(1,23)=1.54, p=.23, MSE=16,431.14, Ƞ2p=.06 (RT); F(1,23)=0.09, p=.76, MSE=0.009, Ƞ2p<.01 (PE)].

As seen in figure S1, contrary to our prediction, the informed-over-uninformed benefit was only seen in the advanced Fadeout Trials. This conclusion has been substantiated in the following analyses.

**Improvement from Trial 0 to first fadeout trial.** Both the informed and the uninformed conditions showed improvement [F(1,23)=5.40, p=.03, MSE=11,659.00, Ƞ2p=.19 (informed RT); F(1,23)=33.27, p<.001, MSE=7,483.28, Ƞ2p=.59 (uninformed RT); F(1,23)=27.17, p<.001, MSE=0.004, Ƞ2p=.54 (informed PE); F(1,23)=11.01, p<.01, Ƞ2p=.32 (uninformed PE)]. These improvements did not significantly differ between the condition (though the result was marginal in RT) [F(1,23)=3.85, p=.06, MSE=7,985.37, Ƞ2p=.14 (RT); F(1,23)=2.21, p=.15, MSE=0.004, Ƞ2p=.09 (PE)]; but the descriptive trends indicated greater RT improvement in the *uninformed* condition and greater PE improvement in the *informed* condition (58 ms and 2.2% errors in the informed, and 30 ms and 3.8% errors in the uninformed condition).

**Improvement from Trial 1 to Trials 2-4.** Improvement was only observed in the RT of the informed condition (by 72 ms), which was accompanied by a slight yet significant PE increase (by 1.4% errors). No significant results were found in the uninformed condition (improvement was 6 ms and 0.5 PE) [F(1,23)=35.92, p<.001, MSE=26,523.91, Ƞ2p=.61 (informed RT); F(1,23)=23.96, p<.001, MSE=0.0009, Ƞ2p=.51 (informed PE); F(1,23)=1.21, p=.28, MSE=3,246.27, Ƞ2p=.05 (uninformed RT); F(1,23)=0.72, p=.40, MSE=0.004, Ƞ2p=.03 (uninformed PE)]. Finally, the difference between the conditions in these trends reached significance, indicating greater RT decrease and PE increase in the informed condition [F(1,23)=46.90, p<.001, MSE=4,988.20, Ƞ2p=.67 (RT); F(1,23)=8.74, p<.01, MSE=0.002, Ƞ2p=.27 (PE)]; supporting an interpretation in terms of a speed-accuracy shift in the informed condition.

**Improvement within the fadeout phase (Trials 2-4).**  This linear contrast tests whether there is further improvement after the first trial, which should occur in case of gradual improvement. In the informed fadeout condition the results were even in the opposite direction, with a 5 ms and 0.5% PE increase from Trial 2 to Trial 4, and therefore we did not perform a significance test. In the uninformed condition, RT were the same in Trials 2-4, and PE improved by 1.1% (a difference that did not reach significance [F(1,23)=2.16, p=.15, MSE=0.004, Ƞ2p=.08]).

**Informed fadeout effect in Trials 2-4.** Finally, since no difference in performance was found between Trials 2-4, we compared the fadeout conditions in mean Trial 2-to-Trial 4 performance. The results indicate an advantage for the informed condition in RT (by 18 ms), and no difference in PE (less than 0.05% errors difference) [F(1,23)=11.26, p<.01, MSE=6,105.03, Ƞ2p=.33 (RT); F(1,23)=0.02, p=.89, MSE=0.002, Ƞ2p<.01 (PE)].

To conclude, the results show an informed fadeout effect: improved RT in the advanced trials of the informed condition. When informed, participants were relatively cautious (slower but more accurate relative to the uninformed fadeout) in the first trial of the sequence; and from the second trial onward they were quicker than, but as accurate as, in the uninformed condition. Importantly, this informed-related speed-accuracy tradeoff trend did not replicate in the other experiments. Finally, the fadeout length did not influence performance and thus in the subsequent experiments we chose a constant but relatively long informed fadeout.

**Supplementary Material S2 - Experiment S2**

Experiment S2 had two goals: 1) test how the position of the informed fadeout within the trial-block influences performance; and 2) test whether the informed fadeout effect will still be observed when randomly sequencing the uninformed trials (as opposed to pre-programming them, as done in Experiment S1).

In the current experiment, we tested whether the informed fadeout effect changes if participants do not have to return to the canceled task immediately as soon as the fadeout phase is over – that is, at the end of the trial-block. Thus, half of the participants performed the informed fadeout only at the end of the mixed-task blocks. Supposedly, when fadeout took place in the middle of the block as in Experiment S1, there was an incentive to maintain the canceled task in a partially activated state, knowing that it is about to be required soon. However, such incentive is greatly reduced when fadeout takes place at the end of the block. We therefore predicted a more pronounced informed fadeout effect when fadeout would take place at the end than in the middle of the block. Also, as in Experiment S1, participants received a reminder regarding the task-sets and response keys after each block. With this reminder they could re-activate that task at the end of the trial-block.

In addition, the Fadeout-Length was constantly 10 trials long, which allowed testing whether permitting a longer fadeout phase than in Experiment S1 would further encourage participants to abandon the canceled task. Finally, the consecutive amount of *uninformed* repeat trials was not controlled for, meaning that we examined sequences that happened by chance. This made the uninformed fadeout less predictable (contrary to Experiment S1, in which the uninformed repeat trials appeared in successions of at least 4 trials).

The results showed an increased informed fadeout effect in the groups that performed the informed fadeout at the end of trial-blocks (relative to Experiment S1), and thus the basic design used in this group was used in Experiments 1-3.

**Method**

**Participants**.Thirty Ben-Gurion University of the Negev students, similar to those in Experiment S1, participated in the experiment (17 females, mean age=24.77, SD=1.98). The participants were randomly assigned to the two groups, one who received the informed fadeout at the end of the block throughout the experiment and one who received it at a random position during the block. Two of the participants (one of each group) were removed from the analysis due to an exceptionally high error rate (approximately 25% errors as compared to 0.05%-11.5% in the remaining participants). Since the critical comparison concerned the interaction between Group (middle-vs.-end of block) and Fadeout, we ran the power analysis targeting a 1-df interaction contrast involving a between and a within subjects variable. According to G-Power (Faul, et al., 2009), this sample size is sufficient to detect an effect of η2p=.17 with Power>.80 (assuming a correlation of .70 between the repeated measurements).

**Materials and procedure**.We used the same materials as in the previous experiment. Unlike in Experiment S1, the *informed* fadeout's position was manipulated between participants. For half of the participants, the informed fadeout was placed at a randomly chosen position during the block, and for the other half, it was placed at the end of the blocks. Only half of the blocks contained an informed fadeout phase. In contrast, the *uninformed* fadeout was always randomized during the block (as in Experiment S1), only that in this experiment, the ordering of *uninformed* repeat trials was completely randomly determined by the computer program, meaning that the occurrence of long sequences of repeat trials was determined by chance. Nonetheless, to match for the group that performed the informed fadeout phases at the end of the blocks, the uninformed trials used in the analyses of this group's results came from the 20 final trials of the block.

There were 36 blocks with 60 trials each. Half of the trials were repeat trials and half were switch trials. Unlike in Experiment S1, the cue for the informed fadeout phase did not include a countdown, other than in the last 4 trials (which are not included in the analyses). Trial 0 (baseline) was a switch trial in this experiment as well.

**Results and Discussion**

Since the consecutive amount of uniformed trials was not controlled for, a number of consecutive repeat trials that did not leave any missing data for any participant was chosen. In order to equate the fadeout conditions as much as possible, only uninformed trials that were a part of a sequence of at least 4 consecutive repeat trials were used. The set of contrasts was now based on the results obtained in Experiment S1, that are elaborated on in Table 2.

**Difference at Trial 0.** No differences at Trial 0 between the informed and the uninformed conditions were found in either of the groups (all F’s<1.85, p’s>.18).

**Improvement from Trial 0 to first fadeout trial.** In RT, in both groups no significant improvement from Trial 0 to Trial 1 was found in neither the informed nor the uninformed conditions (all F’s<1, p’s>.33; A small non-significant 15 ms *increase* was found in the uninformed condition at the end of block group). In PE, the informed condition showed a marginally significant improvement in both groups [F(1,27)=3.33, p=.08, MSE=0.005, Ƞ2p=.11 (end of block group); F(1,27)=3.44, p=.07, MSE=0.005, Ƞ2p=.11 (during-block group)].

The improvement in the uninformed condition did not reach significance in both groups (both F’s<1.11, p’s>.30). Nonetheless, the difference in improvement between these trends did not reach significance as well, indicating that there was no greater improvement in the informed condition (F’s<1, p’s>.54).

**Difference in Trial 1.**  For the group that performed the informed fadeout at the end of blocks, a significant (4.75%) effect was found in PE [F(1,27)=5.98, p=.02, MSE=0.005, Ƞ2p=.18]. Another marginally significant advantage (of 73 ms) was found in this group in RT [F(1,27)=3.41, p=.07, MSE=21,882.40, Ƞ2p=.11]; though this could be due to the small increase from baseline found in the uninformed condition. For the group that performed the informed fadeout during blocks (showing an advantage of 17 ms and 2% errors for the informed condition), no significant differences were found (F’s<1.15, p’s>.29).

**Improvement from Trial 1 to Trials 2-4.** For the end-of-blocks group, a significant RT improvement was found for both the informed (107 ms) and the uninformed (73 ms) conditions [F(1,27)=13.44, p<.01, MSE=17,895.44, Ƞ2p=.33 (informed); F(1,27)=5.50, p=.03, MSE=20,380.74, Ƞ2p=.17 (uninformed)]; with no significant difference between them [F(1,27)=0.61, p=.44, MSE=19,854.39, Ƞ2p=.02]. These results indicate that a step-function in RT took place in both fadeout conditions in this group. In PE, the results were reversed in the informed condition (with an increase of 2.4% errors), though not significantly [F(1,27)=2.56, p=.12, MSE=0.005, Ƞ2p=.09]. In the uninformed condition, there was a marginally significant improvement of 2.97% errors [F(1,27)=3.52, p=.07, MSE=0.005, Ƞ2p=.11].

For the during-blocks group, performance improved by 29 ms and 0.20% errors and by 18 ms and 0.81% errors in the informed and the uninformed condition, respectively, though none of these trends reached significance (F’s<1.07, p’s>.31).

**Improvement within the fadeout phase.** This contrast directly testes the experience-based hypothesis. A linear contrast in Trials 2-4 did not reach significance in any of the groups, in neither RT nor PE, though a trend in this direction was observed in RT at the end-of-blocks group [F(1,27)=3.11, p=.09, MSE=4,066.01, Ƞ2p=.10; all other F’s<0.67, p’s>.42).

**Difference in Trials 2-4.** Finally, the informed fadeout effect was found in RT in the end-of-blocks group (107 ms) [F(1,27)=21.94, p<.001, MSE=22,512.35, Ƞ2p=.44]. This effect did not reach significance in the during-blocks group (28 ms) [F(1,27)=1.59, p=.22, MSE=22,512.35, Ƞ2p=.05], though this could be due to a statistical bias[[1]](#endnote-1). In PE, the effect did not reach significance in both groups, though the trend was slightly reversed at the end-of-blocks groups (0.62% errors advantage for the uninformed condition) [F(1,27)=0.58, p=.45, MSE=0.003, Ƞ2p=.02]; but at the expected direction at the during-blocks group (1.40% errors advantage for the informed condition) [F(1,27)=3.10, p=.09, MSE=0.003, Ƞ2p=.10].

These results indicate a greater informed fadeout effect when the informed condition appeared at the end of trial-block, and it was only robust in RT.

To summarize, in RT, both Fadeout-Position groups showed a significant informed-fadeout effect, but only from the second trial of the sequence, more-or-less replicating Experiment S1. Nonetheless, the informed fadeout effect was more pronounced at the end of blocks. There were no significant effects in PE. Thus, this design was chosen to serve as the basis for Experiments 1-3.

Figure S2. RT (in ms) and Percentage of Errors (PE) as a function of Fadeout- Position, Trial-Position and Fadeout-Type – Experiment S2. Error bars represent within-subject confidence intervals (Hollands & Jarmasz, 2010; Jarmasz, & Hollands, 2009).

**Supplementary Material S3 – Analysis of Experiments 1-3 with a different baseline**

As noted in the main text, using the trial just prior to Trial 1 resulted in substantial missing data (since to equate the two fadeout conditions, only task-switch trials were included). In addition, this baseline was a task-switch trial, which bears a difference from Trial 1 onward that were task-repetition trials. Nonetheless, this baseline is still important since it immediately preceded the fadeout and it thus sustains the continuity of the sequential order of trials. Generally, the conclusions did not differ from those obtained with the alternative baseline that is reported in the main text. Since this baseline immediately preceded the first fadeout trial it is termed Trial 0 in the following report (as in Experiments S1 and S2), which comprises only analyses that include Trial 0.

**Experiment 1**

Including only task-switch trials at baseline (Trial 0) of the informed condition caused some missing data, so the following analyses include 17 (in RT) and 18 (in percentage of errors, PE) participants.

**Difference at Trial 0.** No significant differences were found between the informed and uninformed conditions at Trial 0 (trend: 19 ms, and 6.2% PE advantage for the informed condition). [F(1,16)=0.23, p=.64, MSE=27,582.76, Ƞ2p=.01 (RT); F(1,17)=2.91, p=.11, MSE=0.024, Ƞ2p=.15 (PE)].

**Improvement from Trial 0 to first fadeout trial.** Since Trial 0 is a switch trial, and Trial 1 is a repeat trial, it is conceivable that *both conditions* will show an improvement in performance from Trial 0 to Trial 1. Indeed, such improvement was observed (21 ms, and 2.2% in errors, informed; 76 ms, and 7.7% errors, uninformed). An indication for an instructions-based effect should have be evident in an increased improved performance in the informed (vs. uninformed) condition. However, only the improvement in the *uninformed* condition reached significance [F(1,16)=.19, p=.67, MSE=42,727.45, Ƞ2p=.01 (informed RT); F(1,16)=5.33, p=.03, MSE=18,616.90, Ƞ2p=.25 (uninformed RT); F(1,17)=0.38, p=.54, MSE=0.021, Ƞ2p=.02 (informed PE); F(1,17)=6.72, p=.02, MSE=0.016, Ƞ2p=.28 (uninformed PE). Nonetheless, the informed-uninformed difference between these trends did not reach significance [F(1,16)=1.02, p=.33, MSE=25,063.51, Ƞ2p=.06 (RT); F(1,17)=1.55, p=.23, MSE=0.017, Ƞ2p=.08 (PE)].

**Figure S3**. RT (in ms) and Percentage of Errors (PE) as a function of Trial and Fadeout-Type – Experiment 1. The single-task reference is shown as a constant value, reflecting the mean RT and PE for Trials 15-30. Error bars represent within-subject confidence intervals (Hollands & Jarmasz, 2010; Jarmasz, & Hollands, 2009).

**Experiment 2 – Results**

As in the previous experiment, Trial 0 in the analyses was a switch trial. Once again, this selection created some missing data (N=16 in RT; N=20 in PE).

**Difference at Trial 0.** No significant differences were found at Trial 0, neither between the (pooled) informed and uninformed conditions (with a 24 ms advantage for the *informed* condition, and a 0.1% error rate advantage for the *uninformed* condition) [F(1,15)=0.58, p=.46, MSE=21,398.23, Ƞ2p=.04 (RT); F(1,19)<0.1, p=.95, MSE=0.006, Ƞ2p<.01 (PE)]; nor between the short and long informed conditions (with a 76 ms advantage for the *long*-informed conditions, and a 1.2% error rate advantage for the *short*-informed condition) [F(1,15)=2.34, p=.15, MSE=40,017.24, Ƞ2p=.13 (RT); F(1,19)<0.1, p=.75, MSE=0.031, Ƞ2p<.01 (PE)].

**Improvement from Trial 0 to first fadeout trial.** As in Experiment 1, a significant improvement in RT from Trial 0 (a switch trial) to Trial 1 (a repeat trial) was only seen in the *uninformed* condition (by 46 ms in RT, and 1.2% in errors); though a numerical non-significant trend in the same direction was observed in the short-informed condition as well (by 31 ms, and 1.1% errors) [F(1,15)=0.25, p=0.62, MSE=61,548.57, Ƞ2p=.02 (short-informed RT); F(1,19)=0.15, p=.70, MSE=0.015, Ƞ2p<.01 (short-informed PE); F(1,15)=6.13, p=.03, MSE=5,460.50, Ƞ2p=.29 (uninformed RT); F(1,19)=0.70, p=.41, MSE=0.005, Ƞ2p<.01 (uninformed PE)].

However, in the long-informed condition, the trend was exceptionally sharp in PE (4.6% error rate improvement) but reversed in RT (by 45 ms), indicating a trend for speed-accuracy tradeoff [F(1,15)=1.52, p=.24, MSE=21,586.37, Ƞ2p=.09 (long-informed RT); F(1,19)=2.16, p=.16, MSE=0.019, Ƞ2p=.10 (long-informed PE)].

Nevertheless, none of the interactions between these trends reached significance – neither the difference in improvement from Trial 0 to Trial 1 between the (pooled) informed condition and the uninformed condition [F(1,15)=1.63, p=.22, MSE=18.,359.18, Ƞ2p=.10 (RT); F(1,19)=0.53, p=.47, MSE=0.006, Ƞ2p=.03 (PE)], nor the difference between the informed conditions [F(1,15)=1.24, p=.28, MSE=37,468.35, Ƞ2p=.08 (RT); F(1,19)=0.62, p=.44, MSE=0.021, Ƞ2p=.03 (PE)].

**Figure S4**. RT (in ms) and Percentage of Errors (PE) as a function of Trial and Fadeout-Type – Experiment 2. "Informed-short" represents the informed condition with 1,500 ms duration in the first cue (replicating Experiment 1), and "informed-long" represents the informed condition with 3,000 ms duration in the first cue. Error bars represent within-subject confidence intervals (Hollands & Jarmasz, 2010; Jarmasz, & Hollands, 2009).

**Experiment 3 – Results**

Trial 0 (which was Trial 27) was either a switch or a repeat trial, and the analyses are based on the mean of the two trial types.

**Difference at Trial 0.** No initial differences between the informed and the uninformed (9 ms, 0.8 % errors) conditions were observed [F(1,38)=0.12, p=.73, MSE=27,719.33, Ƞ2p<.01 (RT); F(1,39)=0.42, p=.52, MSE=0.006, Ƞ2p=.01 (PE)].

**Improvement from Trial 0 to first fadeout trial.** There was no significant difference between Trial 0 and Trial 1 in the informed condition (8 ms, 1.8%) [F(1,38)=0.20, p=.66, MSE=9,862.41, Ƞ2p<.01 (RT); F(1,39)=2.25, p=.14, MSE=0.006, Ƞ2p=.05 (PE)]. In the uninformed condition, there was a non-significant RT increase and a significant PE decrease (-41 ms, 3.3% PE) [F(1,38)=3.04, p=.09, MSE=21,570.47, Ƞ2p=.07 (RT); F(1,39)=5.25, p=.03, MSE=0.008, Ƞ2p=.12 (PE)]. These results imply speed-accuracy tradeoff in the *uninformed* condition following the “continue switching” announcement. However, the descriptive pattern in the informed condition showed some improvement in both RT and PE. The interaction testing the difference between fadeout conditions in these trends did not reach significance neither in RT nor in PE [F(1,38)=2.54, p=.12, MSE=17,722.73, Ƞ2p=.06 (RT); F(1,39)=0.65, p=.43, MSE=0.007, Ƞ2p=.02 (PE)].

**Figure S5**. RT (in ms) and Percentage of Errors (PE) as a function of Trial and Fadeout-Type – Experiment 3. Error bars represent within-subject confidence intervals (Hollands & Jarmasz, 2010; Jarmasz, & Hollands, 2009).

**Footnotes**

1. The pooled error-term in the mixed design made it harder to reach significance when the informed fadeout was during the block. Thus, the two groups were also inserted in two different ANOVAs, showing that the Informed-Fadeout effect in Trials 2-4 was significant in both groups [F(1,14)=4.94, p=.04, MSE=7,254.87, Ƞ2p=.26 (during block); F(1,13)=12.33, p<.01, MSE=38,943.47, Ƞ2p=.49 (end of block)]. These analyses still reflect the fact the Informed Fadeout effect was more pronounced when the fadeout was at the end of block. [↑](#endnote-ref-1)
